# Supplementary material for: Whole-genome characterization of common rotavirus strains circulating in Vellore, India from 2002 to 2017: emergence of non-classical genomic constellations
Source: Gut Pathog. 2023 Sep 20;15:44. doi: 10.1186/s13099-023-00569-6 (PMC10510252; doi:10.1186/s13099-023-00569-6)
Supplement: Supplementary file 2 — Supplementary material 10: GenBank Accession Numbers of 11 segments of 207 study strains sequenced in the study. [file 13099_2023_569_MOESM2_ESM.xlsx]

## Sheet: GenBank Accession Number
SL.NO	STRAIN ID	VP7_9	VP4_4	VP6_6	VP1_1	VP2_2	VP3_3	NSP1_5	NSP2_8	NSP3_7	NSP4_10	NSP5/6_11	REMARKS
1	RVA/Human-wt/IND/IN1000295_CMC_00001/2010/G1P[8]	MN067074	MN067072	MN067073	MN067069	MN067070	MN067071	MN067064	MN067065	MN067066	MN067067	MN067068		MALED NGS
2	RVA/Human-wt/IND/IN1001096_CMC_00007/2011/G9P[8]	MN067203	MN067201	MN067202	NS	MN067199	MN067200	MN067194	MN067195	MN067196	MN067197	MN067198
3	RVA/Human-wt/IND/IN1002773_CMC_00010/2011/G1P[8]	MN066918	MN066916	MN066917	MN066913	MN066914	MN066915	MN066908	MN066909	MN066910	MN066911	MN066912
4	RVA/Human-wt/IND/IN1002926_CMC_00011/2011/G1P[8]	MN067041	MN067039	MN067040	MN067036	MN067037	MN067038	MN067031	MN067032	MN067033	MN067034	MN067035
5	RVA/Human-wt/IND/IN1002928_CMC_00012/2011/G1P[8]	MN067115	MN067113	MN067114	MN067110	MN067111	MN067112	MN067105	MN067106	MN067107	MN067108	MN067109
6	RVA/Human-wt/IND/IN1002929_CMC_00013/2011/G1P[8]	MN067159	MN067157	MN067158	MN067154	MN067155	MN067156	MN067149	MN067150	MN067151	MN067152	MN067153
7	RVA/Human-wt/IND/IN1003708_CMC_00015/2011/G1P[8]	MN066827	MN066825	MN066826	MN066822	MN066823	MN066824	MN066817	MN066818	MN066819	MN066820	MN066821
8	RVA/Human-wt/IND/IN1004398_CMC_00021/2012/G1P[x]	MN066967	NS	MN066966	NS	NS	NS	MN066961	MN066962	MN066963	MN066964	MN066965
9	RVA/Human-wt/IND/IN1006236_CMC_00028/2012/G1P[8]	MN066987	MN066985	MN066986	MN066982	MN066983	MN066984	MN066977	MN066978	MN066979	MN066980	MN066981
10	RVA/Human-wt/IND/IN1006324_CMC_00029/2012/G1P[8]	MN067137	MN067135	MN067136	MN067132	MN067133	MN067134	MN067127	MN067128	MN067129	MN067130,OR210358	MN067131
11	RVA/Human-wt/IND/IN1006379_CMC_00030/2012/G1P[8]	MN066859	MN066857	MN066858	MN066854	MN066855	MN066855	MN066849	MN066850	MN066851	MN066852	MN066853
12	RVA/Human-wt/IND/IN1006476_CMC_00031/2012/G1P[8]	MN066777	MN066775	MN066776	MN066772	MN066773	MN066774	MN066767	MN066768	MN066769	MN066770	MN066771
13	RVA/Human-wt/IND/IN1006722_CMC_00032/2012/G1P[8]	MN066870	MN066868	MN066869	MN066865	MN066866	MN066867	MN066860	MN066861	MN066862	MN066863	MN066864
14	RVA/Human-wt/IND/IN1007249_CMC_00033/2012/G1P[8]	MN067085	MN067083	MN067084	MN067080	MN067081	MN067082	MN067075	MN067076	MN067077	MN067078	MN067079
15	RVA/Human-wt/IND/IN1008549_CMC_00034/2013/G1P[8]	MN067063	MN067061	MN067062	MN067058	MN067059	MN067060	MN067053	MN067054	MN067055	MN067056,OR210359	MN067057
16	RVA/Human-wt/IND/IN1008580_CMC_00035/2013/G1P[8]	MN066748	MN066746	MN066747	MN066743	MN066744	MN066745	MN066738	MN066739	MN066740	MN066741	MN066742
17	RVA/Human-wt/IND/IN1000324_CMC_00036/2010/G1P[8]	MN067052	MN067050	MN067051	MN067047	MN067048	MN067049	MN067042	MN067043	MN067044	MN067045	MN067046
18	RVA/Human-wt/IND/IN1002852_CMC_00037/2011/G1P[x]	MN066940	NS	MN066939	NS	NS	MN066938	NS	NS	MN066935	MN066936	MN066937
19	RVA/Human-wt/IND/IN1003238_CMC_00038/2011/G4P[6]	MN066816	MN066814	MN066815	MN066811	MN066812	MN066813	NS	MN066807	MN066808	MN066809	MN066810
20	RVA/Human-wt/IND/IN1004468_CMC_00039/2012/G1P[8]	MN067126	MN067124	MN067125	MN067121	MN067122	MN067123	MN067116	MN067117	MN067118	MN067119	MN067120
21	RVA/Human-wt/IND/IN1005022_CMC_00042/2012/G9P[8]	MN067014	MN067012	MN067013	NS	MN067010	MN067011	MN067005	MN067006	MN067007	MN067008	MN067009
22	RVA/Human-wt/IND/IN1008003_CMC_00044/2012/G12P[8]	MN066951	MN066949	MN066950	MN066946	MN066946	MN066948	MN066941	MN066942	MN066943	MN066944	MN066945
23	RVA/Human-wt/IND/IN1008089_CMC_00045/2012/G1P[8]	OR205711	OR205277	OR205510	OR192448	OR193451	OR223984	OR168250	OR168358	OR168547	OR210391	OR205807
24	RVA/Human-wt/IND/IN1008693_CMC_00047/2013/G1P[8]	MN066806	MN066804	MN066805	MN066801	MN066802	MN066803	MN066796	MN066797	MN066798	MN066799	MN066800
25	RVA/Human-wt/IND/IN1010229_CMC_00048/2013/G9P[8]	MN066759	MN066757	MN066758	MN066754	MN066755	MN066756	MN066749	MN066750	MN066751	MN066752	MN066753
26	RVA/Human-wt/IND/IN1000951_CMC_00002/2010/G9P[4]	MN066976	OR233771	MN066975	OR233768	MN066973	MN066974	MN066968	MN066969	MN066970	MN066971	MN066972
27	RVA/Human-wt/IND/IN1000984_CMC_00003/2011/G9P[4]	MN066848	OR233772	MN066847	MN066844	MN066845	MN066846	MN066839	MN066840	MN066841	MN066842	MN066843
28	RVA/Human-wt/IND/IN1001000_CMC_00004/2011/G2P[x]	MN066927	NS	MN066926	MN066924	MN066925	OR233787	MN066919	MN066920	MN066921	MN066922	MN066923
29	RVA/Human-wt/IND/IN1001019_CMC_00005/2011/G9P[4]	MN066996	OR205320	MN066995	MN066993	MN066994	NS	MN066988	MN066989	MN066990	MN066991	MN066992
30	RVA/Human-wt/IND/IN1001026_CMC_00006/2011/G9P[4]	MN067177	OR233774	MN067176	MN067173	MN067174	MN067175	MN067168	MN067169	MN067170	MN067171	MN067172
31	RVA/Human-wt/IND/IN1001419_CMC_00008/2011/G2P[4]	MN066901	OR233775	MN066900	MN066898	MN066899	NS	MN066893	MN066894	MN066895	MN066896	MN066897
32	RVA/Human-wt/IND/IN1001455_CMC_00009/2011/G2P[4]	MN066934	OR233776	MN066933	NS	MN066932	NS	MN066928	MN066929	MN066930	NS	MN066931
33	RVA/Human-wt/IND/IN1003535_CMC_00014/2011/G6P[x]	MN066877	NS	MN066876	NS	MN066875	NS	NS	MN066871	MN066872	MN066873	MN066874
34	RVA/Human-wt/IND/IN1003769_CMC_00016/2011/G2P[4]	MN067094	OR205394	MN067093	MN067091	MN067092	NS	MN067086	MN067087	MN067088	MN067089	MN067090
35	RVA/Human-wt/IND/IN1004030_CMC_00018/2012/G2P[4]	MN067184	OR233778	MN067183	NS	NS	NS	MN067178	MN067179	MN067180	MN067181	MN067182
36	RVA/Human-wt/IND/IN1004034_CMC_00019/2012/G2P[4]	MN067030	OR233779	MN067029	NS	MN067028	NS	MN067023	MN067024	MN067025	MN067026	MN067027
37	RVA/Human-wt/IND/IN1004413_CMC_00022/2012/GxP[14]	NS	MN066959	MN066960	MN066956	MN066957	MN066958	NS	MN066952	MN066953	MN066953	MN066955
38	RVA/Human-wt/IND/IN1004509_CMC_00023/2012/G2P[4]	MN067193	OR233780	MN067192	NS	MN067190	MN067191	MN067185	MN067186	MN067187	MN067188	MN067189
39	RVA/Human-wt/IND/IN1004561_CMC_00024/2012/G2P[4]	MN066787	OR233781	MN066786	MN066783	MN066784	MN066785	MN066778	MN066779	MN066780	MN066781	MN066782
40	RVA/Human-wt/IND/IN1004655_CMC_00025/2012/G2P[8]	MN066795	OR233785	MN066794	NS	MN066793	NS	MN066788	MN066789	MN066790	MN066791	MN066792
41	RVA/Human-wt/IND/IN1004682_CMC_00026/2012/G2P[4]	MN067167	OR233782	MN067166	NS	MN067165	NS	MN067160	MN067161	MN067162	MN067163	MN067164
42	RVA/Human-wt/IND/IN1005086_CMC_00027/2012/G2P[8]	MN067148	MN067146	MN067147	MN067143	MN067144	MN067145	MN067138	MN067139	MN067140	MN067141	MN067142
43	RVA/Human-wt/IND/IN1004493_CMC_00040/2012/G2P[4]	MN067104	OR233783	MN067103	MN067100	MN067101	MN067102	MN067095	MN067096	MN067097	MN067098	MN067099
44	RVA/Human-wt/IND/IN1004802_CMC_00041/2012/G9P[x]	MN067004	NS	MN067003	OR233769	MN067002	NS	MN066997	MN066998	MN066999	MN067000	MN067001
45	RVA/Human-wt/IND/IN1005331_CMC_00043/2012/G2P[4]	MN066892	OR233784	MN066891	MN066889	MN066890	NS	MN066884	MN066885	MN066886	MN066887	MN066888
46	RVA/Human-wt/IND/C-107/2006/G1P[8]	OR205674	OR205322	OR205546	OR192465	OR193413	OR224029	OR168236	OR168395	OR168529	OR210380	OR205766
47	RVA/Human-wt/IND/C-450/2007/G1P[8]	OR205702	OR205283	OR205567	OR192451	OR205263	OR224019	OR168267	OR168313	OR168583	OR210343	OR205862
48	RVA/Human-wt/IND/C-510/2007/G1P[8]	OR205735	OR205314	OR205535	OR192485	OR193463	OR224003	OR168263	OR168301	OR168562	OR210330	OR205831
49	RVA/Human-wt/IND/C-559/2007/G1P[8]	OR205736	OR205347	OR205534	OR192484	OR193462	OR224004	OR168235	OR168302	OR168561	OR210324	OR205797
50	RVA/Human-wt/IND/C-793/2008/G1P[8]	OR205734	OR205315	OR205528	OR192483	OR193472	OR224000	OR168278	OR168299	OR168560	NS	OR205832
51	RVA/Human-wt/IND/C-826/2008/G1P[8]	OR205699	OR205275	OR205564	OR192453	OR205265	OR224020	OR168266	OR168315	OR168589	OR210338	OR205861
52	RVA/Human-wt/IND/C-929/2008/G1P[8]	OR205700	OR205343	OR205539	OR192463	OR205260	OR224026	OR168276	OR168307	OR168594	OR210345	OR205847
53	RVA/Human-wt/IND/IRID-2631/2009/G1P[8]	OR205697	OR205337	OR205418	OR192460	OR193467	NS	OR168275	OR168317	OR168595	OR210335	OR205848
54	RVA/Human-wt/IND/LBF-054/2009/G1P[8]	OR205721	OR205311	OR205550	OR192412	OR193422	OR223976	OR168200	OR168295	OR168617	OR210402	OR205817
55	RVA/Human-wt/IND/LBF-5453/2011/G1P[8]	OR205729	OR205348	OR205571	OR192491	OR205748	OR223988	OR168223	OR168342	OR168544	OR210362	OR205779
56	RVA/Human-wt/IND/LBF-7652/2012/G1P[8]	OR205728	OR205350	OR205572	OR192490	OR205751	OR223989	OR168222	OR168338	OR168546	OR210366	OR205781
57	RVA/Human-wt/IND/CM-0059/2012/G1P[8]	OR205726	OR260101	OR205517	OR192421	OR205753	OR223969	OR168188	OR168310	OR168604	OR210419	OR205774
58	RVA/Human-wt/IND/CM-0168/2013/G1P[8]	OR205720	OR205345	OR205569	OR192414	OR193476	OR223970	OR168219	OR168337	OR168540	OR210360	OR205771
59	RVA/Human-wt/IND/CM-0373/2013/G1P[8]	OR205745	OR205278	OR205514	OR192488	OR193424,OR193445	OR223986	OR168247	OR168368	OR168549	OR210386	OR205819
60	RVA/Human-wt/IND/CM-0547/2013/G1P[8]	OR205673	OR205308	OR205486	OR192435	OR193439	NS	OR168208	OR168378	OR168609	OR210382	OR205808
61	RVA/Human-wt/IND/CM-0630/2014/G1P[8]	OR205688	OR205307	OR205491	OR192439	OR193438	OR224054	OR168209	OR168369	OR168611	OR210400	OR205829
62	RVA/Human-wt/IND/CM-0745/2014/G1P[8]	OR205681	OR205309	OR205492	OR192440	OR193440	OR224051	OR168203	OR168388	OR168610	OR210401	OR205830
63	RVA/Human-wt/IND/CM-0809/2014/G1P[8]	OR205743	OR205276	OR205504	OR192410	OR193452	OR224039	OR168217	OR168360	OR168623	OR210422	OR205793
64	RVA/Human-wt/IND/CM-0910/2014/G1P[8]	OR205682	OR205306	OR205487	OR260099	OR205259	OR224049	OR168249	OR168370	OR168612	OR210403	OR205825
65	RVA/Human-wt/IND/CM-0941/2014/G1P[8]	OR205676,OR205677	OR205304	OR205495	OR192433	OR193437	OR224055	OR168211	OR168379	OR168613	OR210390	OR205763
66	RVA/Human-wt/IND/CM-0987/2015/G1P[8]	OR205683	OR205305	OR205496	OR192436	OR205755	OR224048	OR168199	OR168373	OR168614	OR210394	OR205824
67	RVA/Human-wt/IND/CM-1050/2015/G1P[8]	OR205690	OR205302	OR205497	OR192438	OR193436	OR224050	OR168204	OR168380	OR168608	OR210392	OR205828
68	RVA/Human-wt/IND/CM-1243/2015/G1P[8]	OR205686	OR205296	OR205505	OR192425	OR193430	OR224052	OR168205	OR168371	OR168455	OR210395	OR205794
69	RVA/Human-wt/IND/RO1-9049/2010/G1P[8]	OR205687	OR205355	OR205506	OR192424	OR193431	OR224053	OR168206	OR168372	OR168456	OR210396	OR205795
70	RVA/Human-wt/IND/RO1-16436/2011/G1P[8]	OR205725	OR205354	OR205575	OR192496	OR205750	OR223985	OR168224	OR168340	OR168603	OR210361	OR205778
71	RVA/Human-wt/IND/RV-202/2003/G1P[8]	OR205714	OR205330	OR205526	OR192470	OR193416	OR223972	OR168258	OR168330	OR168554	OR210349	OR205790
72	RVA/Human-wt/IND/RV-219/2003/G1P[8]	OR205713	OR205331	OR205553	OR192478	OR193415	OR223973	OR168283	OR168331	OR168555	OR210350	OR205789
73	RVA/Human-wt/IND/RV-371/2004/G1P[8]	OR205718	OR205328	OR205556	OR192477	OR193417	OR224011	OR168279	OR168353	OR168558	OR210418	OR205844
74	RVA/Human-wt/IND/TN020134/2016/G1P[8]	OR205684	OR205295	OR205488	OR192431	OR205257	OR224038	OR168210	OR168365	OR168598	OR210385	OR205841
75	RVA/Human-wt/IND/TN020197/2017/G1P[8]	OR205685	OR205294	OR205485	OR192426	OR193428	OR224040	OR168207	OR168366	OR168536	OR210388	OR205842
76	RVA/Human-wt/IND/CM-0073/2012/G12P[8]	OR205602	OR205286	OR205511	OR192444	OR193449	OR224034	OR168253	OR168384	OR168553	OR210425	OR205818
77	RVA/Human-wt/IND/CM-1261/2015/G9P[8]	OR205672	OR205310	OR205422	OR192401	OR228021	NS	OR168176	OR168437	OR168538	OR192225	OR192304
78	RVA/Human-wt/IND/RO1-4649/2009/G12P[6]	OR205591	OR227972	OR205540	OR192418	OR205759	OR223974	OR168245	OR168392	OR168575	OR210368	OR205811
79	RVA/Human-wt/IND/CM-0381/2013/G12P[6]	OR205592	OR227973	OR205541	OR192417	OR205758	OR223975	OR168246	OR168356	OR168576	OR210369	OR205810
80	RVA/Human-wt/IND/CM-0625/2014/G12P[6]	OR205589	OR227970	OR205544	OR192500	OR193441	OR223979	OR168243	OR168386	OR168570	OR210370	OR205813
81	RVA/Human-wt/IND/CM-1160/2015/G12P[6]	OR205587	OR227967	OR205542	OR192502	OR193435	OR224056	OR168240	OR168374	OR168568	OR210356	OR205814
82	RVA/Human-wt/IND/RO1-2748/2010/G12P[4]	OR205604	OR205358	OR205483	OR192409	OR205756	OR223963	OR168238	OR168292	OR168625	OR210379	OR205865
83	RVA/Human-wt/IND/RO1- 8980/2010/G12P[6]	OR205593	OR227974	OR205578	OR192354	OR193409,OR205869	OR223967	OR168233	OR168322	OR168578	OR210381	OR205796
84	RVA/Human-wt/IND/RO1-14850/2010/G12P[6]	OR205595	OR227976	OR205581	OR192506	OR193454	OR224012	OR168227	OR168325	OR168527	OR210375	OR205798
85	RVA/Human-wt/IND/RO1-16475/2011/G12P[x]	OR205596	NS	OR205582	OR192505	OR193455	NS	OR168229	OR168326	OR168528	OR210376	OR205805
86	RVA/Human-wt/IND/RO1-24306/2011/G12P[6]	OR205603	OR227981	OR205577	OR192503	OR193453	OR223966	OR168234	OR168321	OR168581	OR210374	OR205806
87	RVA/Human-wt/IND/TN030054/2016/G12P[6]	OR205585	OR227965,OR227978	OR205503	OR192501	OR205258	OR223904	OR168232	OR168359	OR168539	OR210318	OR205764
88	RVA/Human-wt/IND/C-20/2005/G12P[8]	OR205612	OR205281	OR205563	OR192449	OR205251	OR224014	OR168262	OR168297	OR168616	OR210372	OR205800
89	RVA/Human-wt/IND/C-466/2007/G12P[8]	OR205607	OR205344	OR205518	OR192442	OR193412	OR224007	OR168237	OR168298	OR168566	OR210331	OR205851
90	RVA/Human-wt/IND/C-800/2008/G12P[8]	OR205583	OR205338	OR205519	OR192462	OR193473	OR223962	OR168189	OR168329	OR168567	OR210328	OR205788
91	RVA/Human-wt/IND/CM-0100/2012/G12P[8]	OR205597	OR205290	OR205516	OR192445	OR193447	OR224031	OR168251	OR168389	OR168615	OR210420	OR205821
92	RVA/Human-wt/IND/CM-0211/2013/G12P[8]	OR205600	OR205287	OR205507	OR192446	OR193450	OR224035	OR168252	OR168383	OR168552	OR210424	OR205822
93	RVA/Human-wt/IND/CM-0204/2013/G12P[8]	OR205599	OR205279	OR205513	OR192443	OR193448	OR224030	OR168254	OR168390	OR168550	OR210421	OR205823
94	RVA/Human-wt/IND/CM-0225/2013/G12P[8]	OR205601	OR205288	OR205512	OR192468	OR205255	OR224032	OR168248	OR168367	OR168548	OR210348	OR205826
95	RVA/Human-wt/IND/CRI-32585/2005/G12P[6]	OR205584	OR227966	OR205552	OR192419	OR205268	OR223997	OR168286	OR168346	OR168525	OR210409	OR205836
96	RVA/Human-wt/IND/CM-0694/2014/G12P[6]	OR205586	OR227971	OR205543	OR192497	OR193444	OR223978	OR168241	OR168385	OR168573	OR210371	OR205809
97	RVA/Human-wt/IND/CM-0713/2014/G12P[6]	OR205588	OR227968	OR205545	OR192499	OR193443	OR223977	OR168242	OR168393	OR168571	OR260103	OR205816
98	RVA/Human-wt/IND/CM-0684/2014/G12P[6]	OR205590	OR227969	OR205417	OR192498	OR193442	OR223980	OR168244	OR168387	OR168572	OR210367	OR205812
99	RVA/Human-wt/IND/RO1-2504/2009/G12P[6]	OR205605	OR227975	OR205484	OR192415	OR205757	OR223964	OR168239	OR168293	OR168626	OR210378	OR205767
100	RVA/Human-wt/IND/RO1-8625/2010/G12P[6]	OR205598	OR227977	OR205580	OR192504	OR193456	OR224013	OR168228	OR168324	OR168526	OR210377	OR205799
101	RVA/Human-wt/IND/RVGE-164/2012/G12P[6]	OR205606	OR227980	OR205579	OR192461	OR205254	OR223968	OR168231	OR168332	OR168579	OR210351	OR205786
102	RVA/Human-wt/IND/RVGE-505/2012/G12P[6]	OR205594	OR227979	OR205482	OR192441	OR205253	OR223996	OR168216	OR168323	OR168524	OR210383	OR205762
103	RVA/Human-wt/IND/C-0557/2007/G1+G12P[8]	OR205608+G12	OR205282	OR205529,OR205548	OR192507	OR193465,OR193477	OR223998	OR168127,OR168215	OR168415,OR168303,OR168334	OR168597,OR168520	OR210353,OR192268,OR210329	OR205801
104	RVA/Human-wt/IND/C-1057/2009/G12P[8]	OR205609	OR205313	OR205561	OR192459	OR193461	OR223999	OR168273	OR168319	OR168584	OR210347	OR205854
105	RVA/Human-wt/IND/C-1107/2009/G12P[8]	OR205610	OR205340	OR205562	OR192467	OR193471	OR224017	OR168190	OR168320	OR168585	OR210342	OR205855
106	RVA/Human-wt/IND/C-764/2008/G12P[8]	OR205611	OR205280	OR205549	OR192508	OR193421	OR224016	OR168192	OR168296	OR168574	OR210373	OR205864
107	RVA/Human-wt/IND/C-1351/2010/G4P[8]	OR205868	OR205273	OR205509	OR192411	OR193410	OR223960	OR168186	OR168294	OR168624	OR210319	OR205768
108	RVA/Human-wt/IND/CRI-2755/2002/G1P[8]	OR205712	OR205326	OR205554	OR192473	OR193420	OR223971	OR168257	OR168352	OR168556	OR210332	OR205792
109	RVA/Human-wt/IND/CRI-25360/2004/G1P[8]	OR205708	OR205325	OR205558	OR192479	OR205250	OR223961	OR168281	OR168347	OR168531	OR210416,OR192276	OR205846
110	RVA/Human-wt/IND/CM-1340/2015/G1P[8]	OR205741	OR205274	OR205508	OR192416	OR193411	OR224028	OR168187	OR168357	OR168530	OR210384	OR205765
111	RVA/Human-wt/IND/CM-1365/2016/G1P[8]	OR205689	OR205299	OR205499	OR192428	OR193432	OR224044	OR168197	OR168381	OR168600	OR210404	OR205858
112	RVA/Human-wt/IND/CM-1455/2016/G1P[8]	OR205694	OR205298	OR205500	OR192430	OR193433	OR224046	OR168198	OR168375	OR168599	OR210398	OR205859
113	RVA/Human-wt/IND/CM-1463/2016/G1P[8]	OR205693	OR205297	OR205502	OR192429	OR193434	OR224047	OR168195	OR168382	OR168601	OR210405	OR205860
114	RVA/Human-wt/IND/CM-0224/2012/G1P[8]	OR205730	OR205346	OR205570	OR192489	OR205746	OR223982	OR168220	OR168333	OR168541	OR210357	OR205780
115	RVA/Human-wt/IND/CRI-2157/2002/G1P[8]	OR205717	OR205327	OR205555	OR192475	OR193419	OR223992	OR168256	OR168351	OR168557	OR210323	OR205791
116	RVA/Human-wt/IND/CRI-3173/2003/G1P[8]	OR205740	OR205321	OR205560	OR192476	OR205269	OR224008	OR168282	OR168348	OR168535	OR210412	OR205838
117	RVA/Human-wt/IND/CRI-23589/2004/G1P[8]	OR205715	OR205323	OR205524	OR192471	OR193459	OR223990	OR168259	OR168344	OR168622	OR210413	OR205772
118	RVA/Human-wt/IND/CRI-23682/2004/G1P[8]	OR205716	OR205324	OR205525	OR192472	OR193460	OR223991	OR168260	OR168345	OR168619	OR210414	OR205773
119	RVA/Human-wt/IND/C-320/2006/G1P[8]	OR205732	OR205332	OR205520	OR192480	OR193474	OR224001	OR168213	OR168349	OR168532	OR210327	OR205769
120	RVA/Human-wt/IND/C-1339/2010/G1P[8]	OR205696	OR205339	OR205527	OR192452	OR193468	OR224023	OR168277	OR168308	OR168588	OR210333	OR205850
121	RVA/Human-wt/IND/C-1383/2010/G1P[8]	OR205723	OR205357	OR205576	OR192492	OR205747	OR223981	OR168218	OR168327	OR168605	OR210354	OR205782
122	RVA/Human-wt/IND/IRID-4793/2010/G1P[8]	OR205695	OR205351	OR205568	OR192450	OR205252	OR223965	OR168230	OR168328	OR168582	OR210352	OR205827
123	RVA/Human-wt/IND/RO1-2802/2010/G1P[8]	OR205703	OR205334	OR205538	OR192464	OR205261	OR224015	OR168268	OR168309	OR168591	OR210337	OR205857
124	RVA/Human-wt/IND/RV-19/2002/G1P[8]	OR205739	OR260102	OR205559	OR192420	OR193457	OR224010	OR168284	OR168354	OR168534	OR210415	OR205845
125	RVA/Human-wt/IND/RVGE-169/2012/2012/G1P[8]	OR205744	OR205289	OR205515	OR192447	OR193446	OR224033	OR168151	OR168391	OR168551,OR168497	OR210423	OR205820
126	RVA/Human-wt/IND/TN010438/2017/G1P[8]	OR205691	OR205301	OR205501	OR192427	OR205256	OR224045	OR168191	OR168363	OR168602	OR210397	OR205843
127	RVA/Human-wt/IND/TN010462/2017/G1P[8]	OR205680	OR205293	OR205489	OR192432	OR193425	OR224037	OR168202	OR168364	OR168537	OR210387	OR205839
128	RVA/Human-wt/IND/TN020175/2017/G1P[8]	OR205675	OR205303	OR205490	OR192434	OR193429	OR224036	OR168212	OR168376	OR168606	OR210399	OR205804
129	RVA/Human-wt/IND/TN020260/2017/G1P[8]	OR205742	OR205270	OR205461	OR192356	OR228014	NS	OR168174	OR168398	OR168472	OR210317	OR192292
130	RVA/Human-wt/IND/TN030002/2016/G1P[8]	OR205692	OR205300	OR205498	OR192437	OR205754	OR224043	OR168196	OR168377	OR168607	OR210393	OR205840
131	RVA/Human-wt/IND/CRI-11702/2003/G1P[8]	OR205719	OR205329	OR205557	OR192474	OR193418	OR224009	OR168280	OR168355	OR168559	OR210417	OR205837
132	RVA/Human-wt/IND/CRI-13621/2003/G1P[8]	OR205710	OR205271	OR205522	OR192482	OR193458	OR223993	OR168285	OR168335	OR168577	OR210411	OR205783
133	RVA/Human-wt/IND/IRID-4036/2009/G1P[8]	OR205724	OR205352	OR205547	OR192494	OR260100	NS	OR168221	OR168343	OR168543	OR210365,OR210334	OR205776
134	RVA/Human-wt/IND/LBF-4008/2011/G1P[8]	OR205731	OR205353	OR205573	OR192495	OR205749	OR223987	OR168226	OR168341	OR168542	OR210364	OR205777
135	RVA/Human-wt/IND/LBF-4635/2011/G1P[8]	OR205722	OR205312	OR205551	OR192413	OR193423	NS	OR168201	OR168300	OR168618	OR210389	OR205787
136	RVA/Human-wt/IND/LBF-6279/2011/G1P[8]	OR205727	OR205349	OR205574	OR192493	OR205752	OR223983	OR168225	OR168339	OR168545	OR210363	OR205775
137	RVA/Human-wt/IND/C-1146/2009/G1P[8]	OR205704	OR205342	OR205533	OR192466	OR193414	OR224018	OR168274	OR168394	OR168586	OR210341	OR205856
138	RVA/Human-wt/IND/CRI-36681/2005/G1P[8]	OR205709	OR205272	OR205523	OR192469	OR205262	OR223995	OR168255	OR168336	OR168621	OR210410	OR205785
139	RVA/Human-wt/IND/C-1089/2009/G1P[8]	OR205698	OR205335	OR205536	OR192458	OR193469	OR224024	OR168269	OR168306,OR168318	OR168596	OR210344	OR205849
140	RVA/Human-wt/IND/C-0385/2006/G1P[8]	OR205733	OR205333	OR205521	OR192481	OR193475	OR224002	OR168214	OR168350	OR168533	OR210326	OR205770
141	RVA/Human-wt/IND/C-0384/2006/G1P[8]	OR205737	OR205318	OR205530	OR192486	OR193466	OR224006	OR168264	OR168304	OR168564	OR210321	OR205834
142	RVA/Human-wt/IND/C-737/2007/G1P[8]	OR205707	OR205285	OR205565	OR192454	OR205266	OR224021	OR168270	OR168314	OR168587	OR210336,OR210320	OR205835
143	RVA/Human-wt/IND/C-459/2007/G1P[8]	OR205738	OR205316	OR205531	OR192487	OR193464	OR224005	OR168261	OR168305	OR168563	OR210325	OR205833
144	RVA/Human-wt/IND/C-744/2008/G1P[8]	OR205706	OR205284	OR205566	OR192455	OR205267	OR224022	OR168271	OR168311	OR168592	OR210339	OR205863
145	RVA/Human-wt/IND/C-1038/2009/G1P[8]	OR205701	OR205341	OR205537	OR192456	OR205264	OR224025	OR168265	OR168312	OR168593	OR210340	OR205853
146	RVA/Human-wt/IND/C-0982/2008/G1P[8]	OR205705	OR205336	OR205532	OR192457	OR193470	OR224027	OR168272	OR168316	OR168590	OR210346	OR205852
147	RVA/Human-wt/IND/PC/XXXX//G1P[8]	OR205678,OR205679	OR205291,OR205292	OR205493,OR205494	OR192422,OR192423	OR193426,OR193427	OR224041, OR224042	OR168193,OR168194	OR168361,OR168362	OR168461,OR168462	OR210406,OR210407	OR205802,OR205803
148	RVA/Human-wt/IND/C-49/2005/G2P[4]	OR205667	OR205415	OR205472	OR192374	OR227983	OR223923	OR168155	OR168401	OR168511	OR192272	OR192318
149	RVA/Human-wt/IND/C-421/2006/G2P[4]	OR205660	OR205364	OR205428	OR192371	OR228009	OR223905	OR168149	OR168402	OR168517	OR192269	OR192293
150	RVA/Human-wt/IND/C-471/2007/G2P[4]	OR205670	OR205411	OR205476	OR192367	OR228005	OR223927	OR168129	OR168416	OR168523	OR192277	OR192311
151	RVA/Human-wt/IND/C-624/2007/G2P[4]	OR205671	OR205409	OR205473	OR192366	OR228003	OR223930	OR168132	OR168417	OR168514	OR192278	OR192312
152	RVA/Human-wt/IND/C-709/2007/G2P[4]	OR205614	OR205362	OR205424	OR192408	OR227988	OR223959	OR168153	OR168446	OR168506	OR192273	OR192307
153	RVA/Human-wt/IND/C-724/2007/G2P[4]	OR205615	OR205377	OR205425	OR192407	OR227989	OR223938	OR168152	OR168445	OR168504	OR192271	OR192290
154	RVA/Human-wt/IND/C-742/2008/G2P[4]	OR205668	OR205410	OR205477	OR192365	OR228006	OR223928	OR168125	OR168411	OR168515	OR192283	OR192316
155	RVA/Human-wt/IND/C-916/2008/G2P[4]	OR205669	OR205360	OR205474	OR192362	OR227982	OR223906	OR168128	OR168400	OR168503	OR192274	OR192317
156	RVA/Human-wt/IND/C-1119/2009/G2P[4]	OR205628	OR205401	OR205459	OR192378	OR228033	OR223922	OR168166	OR168431	OR168494	OR192265	OR192346
157	RVA/Human-wt/IND/IRID-3271/2009/G2P[4]	OR205635	OR205402	OR205453	OR192379	OR228030	OR223921	OR168165	OR168426	OR168495	OR192263	OR192342
158	RVA/Human-wt/IND/IRID-4588/2009/G2P[4]	OR205636	OR205395	OR205449	OR192380	OR228035	OR223917	OR168164	OR168430	OR168493	OR192264	OR192344
159	RVA/Human-wt/IND/IRID-7766/2010/G2P[4]	OR205622	OR205379	OR205426	OR192358	OR228011	OR223909	OR168157	OR168447	OR168499	OR192233	OR192326
160	RVA/Human-wt/IND/LBF-2332/2011/G2P[4]	OR205652	OR205400	OR205451	OR192382	OR227996	OR223956	OR168142	OR168406	OR168489	OR192255	OR192338
161	RVA/Human-wt/IND/LBF-8409/2012/G2P[4]	OR205646	OR205393	OR205443	OR192388	OR228028	NS	OR168146	OR168425	OR168478	OR192254	OR192334
162	RVA/Human-wt/IND/CM-0180/2013/G2P[4]	OR205624	OR205392	OR205447	OR192392	OR228038	OR223946	OR168137	OR168291	OR168491	OR192253	OR192294
163	RVA/Human-wt/IND/CM-0286/2013/G2P[4]	OR205616	OR205382	OR205463	OR192360	OR228040	OR223916	OR168159	OR168444	OR168464	OR192245	OR192324
164	RVA/Human-wt/IND/CM-0423/2013/G2P[4]	OR205625	OR205374	OR205440	OR192391	OR228036	OR223948	OR168135	OR168288	OR168479	OR192250	OR192332
165	RVA/Human-wt/IND/CM-0493/2013/G2P[4]	OR205621	OR205389	OR205439	OR192376	OR228027	OR223950	OR168134	OR168427	OR168480	OR192234	OR192329
166	RVA/Human-wt/IND/RO1-2968/2010/G2P[4]	OR205634	OR205403	OR205448	OR192355	OR228034	NS	OR168148	OR168429	OR168492	NS	OR192343
167	RVA/Human-wt/IND/RV-362/2004/G2P[4]	OR205654	OR205404	OR205468	OR192350	OR227992	OR223913	OR168169	OR168453	OR168519	OR192246	OR192320
168	RVA/Human-wt/IND/RV-72/2002/G2P[4]	OR205659	OR205363	OR205470	OR192349	OR227985	OR223911	OR168167	OR168449	OR168509	OR192227	OR192306
169	RVA/Human-wt/IND/TN010329/2016/G2P[4]	OR205641	OR205359	OR205435	OR192405	OR228018	OR223958	OR168182	OR168440	OR168467	OR192235	OR192301
170	RVA/Human-wt/IND/TN010437/2017/G2P[4]	OR205642	OR205366	OR205430	OR192398	OR228024	OR223934	OR168180	OR168434	OR168474	OR192237	OR192300
171	RVA/Human-wt/IND/TN010476/2017/G2P[4]	OR205639	OR205371	OR205436	OR192396	OR228019	OR223940	OR168181	OR168441	OR168468	OR192236	OR192305
172	RVA/Human-wt/IND/TN010491/2017/G2P[4]	OR205637	OR205370	OR205437	OR192394	OR228022	OR223941	OR168178	OR168422	OR168466	OR192240	OR192296
173	RVA/Human-wt/IND/TN030007/2016/G2P[4]	OR205643	OR205368	OR205432	OR192403	OR228016	OR223942	OR168184	OR168438	OR168473	OR192243	OR192297
174	RVA/Human-wt/IND/TN020204/2017/G2P[4]	OR205867	OR233758	OR205480	OR192348	OR243314	NS	OR168457	OR168397	OR168458	OR192249	OR205760
175	RVA/Human-wt/IND/RO1-14518/2010/G2P[4]+P[8]	OR205647	OR205396,OR205356	OR205481,OR205455	OR192347,OR192375	OR227998	OR223932	OR168139	OR168287,OR168404	OR168459, OR168487	OR192262	OR192339.OR205761
176	RVA/Human-wt/IND/CM-1146/2015/G2P[4]	OR205665	OR205414	OR205479	OR192368	OR228008	OR224057	OR168131	OR168414	OR168513,OR168569,OR168460	OR210355,OR192280	OR205815
177	RVA/Human-wt/IND/CRI-15462/2004/G2P[4]	OR205630	OR205384	OR205420	OR192352	OR227986	OR223907	OR168172	OR168450	OR168501	OR192228	OR192321
178	RVA/Human-wt/IND/CRI-17112/2004/G2P[4]	OR205661	OR205385	OR205421	OR192353	OR227987	OR223908	OR168173	OR168451	OR168502	OR192229	OR192322
179	RVA/Human-wt/IND/CRI-21245/2004/G2P[4]	OR205633	OR205405	OR205467	NS	OR227991	OR223912	OR168171	OR168454	OR168510	OR192247	OR192319
180	RVA/Human-wt/IND/C-1318/2010/G2P[4]	OR205627	OR205386	OR205450	OR192404	OR228010	OR223918	OR168154	OR168410	OR168463	OR192275	OR192308
181	RVA/Human-wt/IND/C-1326/2010/G2P[4]	OR205655	OR205387	OR205460	OR192377	OR228031	OR223920	OR168162	OR168432	OR168484	OR192267	OR192345
182	RVA/Human-wt/IND/IN1003769/2011/G2P[4]	OR205649	OR205394	OR205444	OR192389	OR228029	OR223952	OR168147	OR168424	OR168481	OR192260	OR192335
183	RVA/Human-wt/IND/CM-1334/2015/G2P[4]	OR205651	OR205391	OR205438	OR192400	OR228020	OR223944	OR168183	OR168439	OR168470	OR192241	OR192295
184	RVA/Human-wt/IND/CM-1369/2016/G2P[4]	OR205644	OR205369	OR205433	OR192402	OR228017	OR223943	OR168185	OR168442	OR168471	OR192242	OR192298
185	RVA/Human-wt/IND/CM-1536/2016/G2P[4]	OR205619	OR205365	OR205431	OR192397	OR228023	OR223933	OR168175	OR168433	OR168475	OR192238	OR192302
186	RVA/Human-wt/IND/CM-0019/2012/G2P[4]	OR205631	OR205373	OR205458	OR192384	OR227994	OR223936	OR168144	OR168408	OR168485	OR192261	OR192325
187	RVA/Human-wt/IND/C-1362/2010/G2P[4]	OR205632	OR205388	OR205454	OR192381	OR228032	OR223919	OR168163	OR168428	OR168496	OR192266	OR192328
188	RVA/Human-wt/IND/CM-0002/2012/G2P[4]	OR205626	OR205375	OR205441	OR192393	OR228037	OR223949	OR168138	OR168289	OR168482	OR192252	OR192331
189	RVA/Human-wt/IND/RV-365/2004/G2P[4]	OR205656	OR205406	OR205469	OR192351	OR227993	OR223914	OR168170	OR168452	OR168518	OR192248	OR192323
190	RVA/Human-wt/IND/RO1-14688/2010/G2P[4]	OR205650	OR205398	OR205457	OR192385	OR227997	OR223955	OR168141	OR168409	OR168488	OR192258	OR192340
191	RVA/Human-wt/IND/RO1-22448/2011/G2P[4]	OR205653	OR205399	OR205452	OR192383	OR227995	OR223957	OR168143	OR168407	OR168486	OR192257	OR192337
192	RVA/Human-wt/IND/RO1-24270/2011/G2P[4]	OR205645	OR205383	OR205464	OR192357	OR228042	OR223937	OR168161	OR168399	OR168498	OR192244	OR192291
193	RVA/Human-wt/IND/RVGE 377/2012/G2P[4]	OR205620	OR205376	OR205442	OR192387	OR228026	OR223951	OR168145	OR168423	OR168483	OR192256	OR192330
194	RVA/Human-wt/IND/TN010382/2016/G2P[4]	OR205640	OR205367	OR205429	OR192399	OR228025	OR223935	OR168179	OR168435	OR168476	OR192239	OR192303
195	RVA/Human-wt/IND/TN020143/2016/G2P[4]	OR205638	OR205372	OR205434	OR192395	OR228015	OR223945	OR168177	OR168436	OR168469	OR192231	OR192299
196	RVA/Human-wt/IND/LBF-5948/2011/G2P[x]	OR205629	NS	OR205445	NS	OR228013	NS	OR168160	OR168396	OR168580	OR192226	OR205866
197	RVA/Human-wt/IND/CM-0114/2012/G2P[4]	OR205617	OR205381	OR205462	OR192361	OR228041	OR223947	OR168150	OR168443	OR168465	OR192230	OR192333
198	RVA/Human-wt/IND/CM-0170/2012/G2P[4]	OR205618	OR205390	OR205446	OR192390	OR228039	OR223953	OR168136	OR168290	OR168477	OR192251	OR192336
199	RVA/Human-wt/IND/RO1-13443/2010/G2P[4]	OR205623	OR205380	OR205427	OR192359	OR228012	OR223910	OR168158	OR168448	OR168500	OR192232	OR192327
200	RVA/Human-wt/IND/RO1-14242/2010/G2P[4]	OR205648	OR205397	OR205456	OR192386	OR227999	OR223954	OR168140	OR168405	OR168490	OR192259	OR192341
201	RVA/Human-wt/IND/CRI-34630/2005/G2P[4]	OR205658	OR205416	OR205471	OR192372	OR228002	OR223924	OR168156	OR168403	OR168522	OR192279	OR192289
202	RVA/Human-wt/IND/C-65/2006/G2P[4]	OR205657	OR205361	OR205419	OR192373	OR227984	OR223915	OR168168	OR168421	OR168512	OR192286	OR192288
203	RVA/Human-wt/IND/C-422/2006/G2P[4]	OR205664	OR205412	OR205475	OR192370	OR228007	OR223929	OR168133	OR168412	OR168521	OR192282	OR192313
204	RVA/Human-wt/IND/C-446/2006/G2P[4]	OR205666	OR205413	OR205478	OR192369	OR228004	OR223931	OR168130	OR168413	OR168516	OR192281	OR192310
205	RVA/Human-wt/IND/C-827/2008/G2P[4]	OR205662	OR205407	OR205465	OR192363	OR228000	OR223925	OR168123	OR168418	OR168507	OR192284	OR192314
206	RVA/Human-wt/IND/C-839/2008/G2P[4]	OR205663	OR205408	OR205466	OR192364	OR228001	OR223926	OR168124	OR168419	OR168508	OR192285	OR192309
207	RVA/Human-wt/IND/C-875/2008/G2P[4]	OR205613	OR205378	OR205423	OR192406	OR227990	OR223939	OR168126	OR168420	OR168505	OR192270	OR192315
		NS-NOT SEQUENCED, SEGMENT MISSING
